# **A Real-life Study of the Positive Response to DAA-based Therapies for Hepatitis C in Brazil**

Simone Monzani Vivaldini<sup>1,2\*</sup>; Rachel Abraão Ribeiro<sup>1</sup>; Gláucio Mosimann Júnior<sup>1</sup>; Karen Cristine Tonini<sup>1</sup>; Gerson Fernando Mendes Pereira<sup>1</sup>; Wildo Navegantes de Araújo<sup>2,3,4</sup>.

1 Department of Chronic Conditions Diseases and other Sexually Transmitted Infections, Secretariat for Health Surveillance, Ministry of Health – Brasília/DF, Brazil.

2 Center for Tropical Medicine, Faculty of Medicine, University of Brasília (UnB), Brasília/DF, Brazil

3 National Institute for Science and Technology for Health Technology Assessment, Porto Alegre/RS, Brazil.

4 Faculty of Ceilândia, University of Brasília (UnB), Brasília/DF, Brazil

\*Corresponding author: [simonevivaldini@gmail.com](mailto:simonevivaldini@gmail.com)

## **Abstract**

Treating hepatitis C virus (HCV) infections reduces overall mortality and the risk of multiple extrahepatic complications. Direct-acting antivirals (DAAs) are molecules that target specific non-structural proteins of the virus, resulting in the disruption of viral replication and infection. This report describes the activities undertaken to assess the cure of HCV in patients of different age groups, supported by the Viral Hepatitis National Program of the Unified Health System in Brazil.

Around 11,000 patients were evaluated in an electronic retrospective cohort, which used therapeutic schemes with Sofosbuvir (SOF), Daclatasvir (DCV), Simeprevir (SMV), and an association of Ombitasvir, Veruprevir/Ritonavir and Dasabuvir (3D) with or without Ribavirin

**NOTE: This preprint reports new research that has not been certified by peer review and should not be used to guide clinical practice.**

(RBV), with sustained virologic response (SVR) or viral cure after a 12-week treatment. We conducted logistic regressions to identify factors independently associated with positive response to DAA-based therapies.

Among evaluated patients, 57.1% were male; 48.3% identified as white; 78.3% were over 50 years old; 44.1% were from the Southeast region; 47.7% had genotype 1b; and 84.5% were treated for 12 weeks. The SVR rates with DAAs ranged from 87% to 100%. Genotypes 1 and 4 had a better response (96.3 to 100% of SVR) to therapy with DAAs, and genotypes 2 and 3 had SVR of 90.6% to 92.2%. Different treatment periods showed SVR with an average of 95.0% and 95.9% for 12 and 24 weeks, respectively. In the odds ratio assessment, we verified that females were half as likely (OR 0.5; CI 95% 0.4-0.6) to have a negative response to therapy, when compared to males, and that genotypes 2 and 3 were around twice more likely (OR 1.5-2.2; CI 95% 0.7-2.9; 1.2-3.6 and OR 2.7-2.8; CI 95% 2.0-3.8, respectively) to not have SVR after therapy when compared to genotype 1. Patients aged between 50 and 69 years old were 1.2 times (OR 1,2; CI95% 0,7-1,9) more likely to not have SVR when treated with DAAs, when compared to other age groups.

This study is the first of this magnitude to be held in a Latin-American country with high SVR results, supported by a free-of-charge universal and public health system. We confirm the high performance of DAA-based therapies which support the Brazilian public health policy decision of adopting them as an important part of the country's strategy to eliminate HCV by 2030.

**Key words:** hepatitis C, treatment, direct-acting antivirals, health policy, Brazil.

1

## 2 **Introduction**

3 Globally, there are an estimated 71 million people with chronic hepatitis C virus (HCV)  
4 infection and only a small minority were able to access curative treatment in 2016 <sup>[1, 2]</sup>. Due to  
5 the substantial impact of hepatitis C virus (HCV) infection globally on patients, their families,

6 and public health systems, the World Health Organization (WHO) has set HCV elimination  
7 goals that include the reduction of HCV incidence by 80% and HCV-related mortality by 65%  
8 before 2030 <sup>[1, 3]</sup>. As part of the strategy to achieve these goals, WHO included all-oral,  
9 interferon-free, direct-acting antiviral (DAA) regimens in its 2017 edition <sup>[1, 3, 4]</sup>.

10 About 632,000 people in Brazil are infected with HCV, with seroprevalence of 0.70 in  
11 the population aged between 15 and 69 years <sup>[5]</sup>. Most HCV-infected people are unaware of  
12 their status until the virus has caused serious liver damage <sup>[3, 6, 7]</sup>. The introduction of DAAs in  
13 2015 has changed the landscape of treatment and its associated outcomes in the Brazilian  
14 Unified National Health System (SUS) <sup>[6]</sup>. Despite the high potency of DAAs, their high cost  
15 initially represented a serious barrier, leading to the rationing of HCV treatment for patients  
16 with high risk of disease progression and the development of complications <sup>[7, 8, 9, 10, 11]</sup>.  
17 However, today all Brazilian patients have access to these therapies.

18 Brazil's National Report for HCV treatment was launched in 2015, elaborated by the  
19 Brazilian Ministry of Health (MoH-Brazil), and adopted by SUS <sup>[6]</sup>. In 2018, the MoH-Brazil  
20 took a step forward to support the development and implementation of national multi-sector  
21 policies and strategies for hepatitis prevention and control in Brazil, for all HCV-infected  
22 patients, regardless of the degree of liver fibrosis <sup>[12]</sup>. Since many countries are working on  
23 action plans to address HCV, different methodologies, processes, and ways to move forward  
24 have been identified. Therefore, the analysis and comparison of Brazil's policies may offer an  
25 opportunity to accelerate the development and implementation of new national plans <sup>[13]</sup>. SUS  
26 supported the annual cost per capita of US\$ 6,152.85 on average for DAA-based therapies  
27 from 2015 to 2018 <sup>[14]</sup>. The Ministry of Health has developed a mathematical model to better  
28 understand the national prevalence data and establish its own elimination goals, including an  
29 estimation of the number of people to be treated <sup>[5, 15]</sup>.

30           Since the isolation of the hepatitis C virus in 1989, several strategies to eliminate the  
31 infection have been studied. Interferon was the first drug used for treatment, having been used  
32 for many years. The addition of Ribavirin allowed the achievement of sustained virologic  
33 response (SVR) rates of around 55%. The most important change occurred with the  
34 introduction of DAAs: shorter treatments, oral use, and general SVR rates above 95% [15]. The  
35 purpose of this study is to determine the impact of DAA regimens within all 27 Brazilian states  
36 and to identify the factors associated with SVR.

37

### 38 **Materials and Methods**

39           A retrospective cohort study was conducted using different national databases of the  
40 Brazilian Public Health System, including the diagnostic information system (GAL), hospital  
41 information system (SIH), and treatment information system (HORUS). The population for  
42 this study included people with acute or chronic hepatitis C, most of them with important  
43 comorbidities. They were part of the first groups treated by the Brazilian National Health  
44 System (SUS) with therapeutic schemes which sometimes employed Ribavirin (RBV) and/or  
45 Peginterferon alfa-2a (PEG) but, in most cases, were composed of direct-acting antivirals:  
46 Sofosbuvir (SOF), Daclatasvir (DCV), Simeprevir (SMV) or  
47 Ombitasvir/Veruprevir/Ritonavir+Dasabuvir (3D). These drugs used different therapeutic  
48 combinations: SOF+DCV±RBV; SOF+SMV±RBV; SOF+RBV; 3D±RBV; SOF+PEG+RBV.  
49 Treatments conducted exclusively with Peginterferon alfa-2a and Ribavirin were also included  
50 with the objective of obtaining a comparative reference to DAA-based treatments.

51           To obtain the final database with the selected population, two steps were developed.  
52 The first step consisted of identifying a probabilistic relationship among the following  
53 databases: (i) Laboratory Environment Management System (GAL) – which contains data from  
54 the Central Laboratories of Public Health (LACEN); (ii) SUS Ambulatory Information System

55 (SIA/SUS) – which includes records from the High Complexity Procedures Authorization  
56 (APAC) database; and (iii) Individual Outpatient Production Bulletins (BPAI) – which contain  
57 information recorded by states concerning requests and delivery of medication. From this  
58 relationship, a unique numeric code (ID) was attributed to each patient and this code was  
59 replicated in the different databases to allow the connection of the information taken from  
60 different sources. Later, patients’ personal data were suppressed to maintain anonymity. This  
61 step was developed by the SUS Department of Information Technology (DATASUS) through  
62 a project called “*VinculaSUS*”<sup>[19]</sup>, whose objective is to facilitate researchers’ analyses of  
63 policies developed by the Brazilian Ministry of Health while maintaining ethical commitments  
64 and the confidentiality of personal data.

65         The second step consisted of selecting patients with at least one viral load count by  
66 quantitative real-time qPCR-HCV test from the GAL database and some record of treatment  
67 for HCV in the SIA/SUS database, filtering patients who had detectable qPCR-HCV following  
68 12 weeks of treatment and assessing how many of these patients presented SVR to HCV. Figure  
69 1 details the procedures and quantifies the results of the first and second steps.

70

71

72

73

74

75

76

77

78

79 **Figure 1.** Relationship information from the databases used and final identification of 11,308

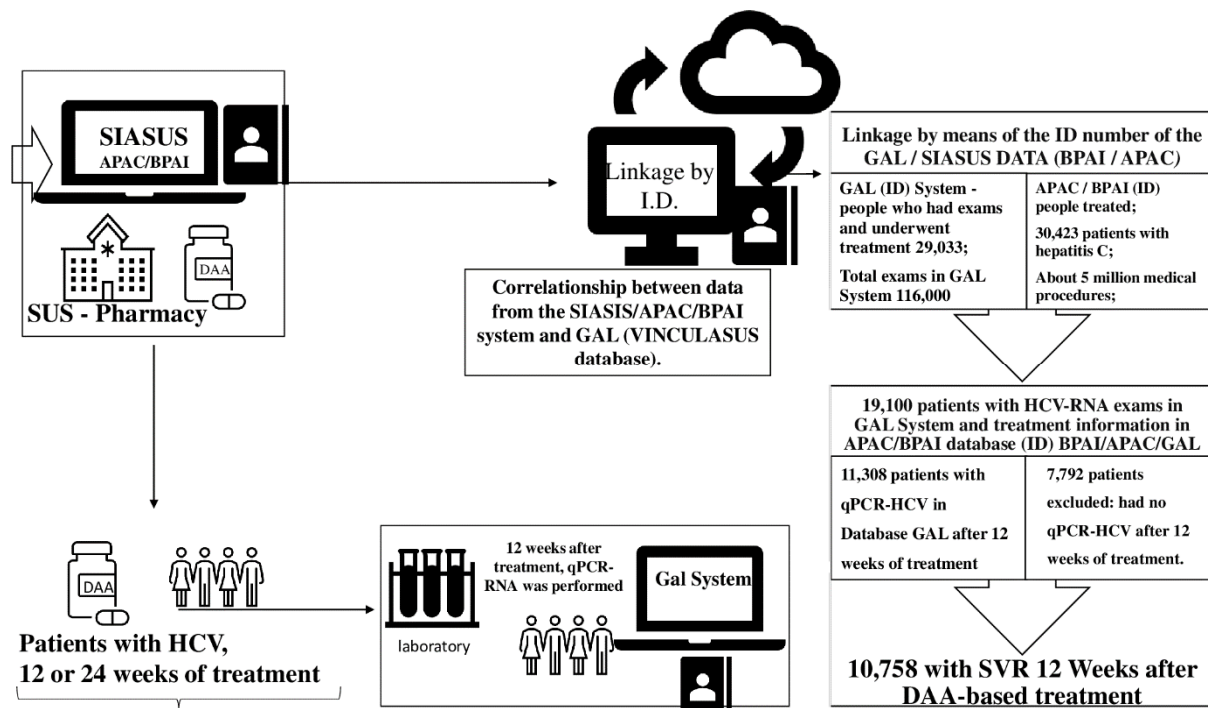

80

81

82 patients who completed the post-treatment investigation (quantitative qPCR-HCV test).

83 From the final database, descriptive analyses were performed with the objective of  
 84 understanding the studied population and the procedures of interest that were adopted. All  
 85 available sociodemographic, clinical, and laboratory variables were analyzed: sex, age,  
 86 race/color, place of residence, genotype, time of treatment, therapeutic scheme, start and end  
 87 date of treatment, date of laboratory tests, and respective results of qPCR-HCV tests. Trend  
 88 and dispersion measures were used for numerical variables, and rates or proportions were  
 89 utilized for categorical variables.

90 Patients were spatially distributed into three groups: 1) those registered in the APAC  
 91 database who had at least one exam registered in the GAL database; 2) those registered in the  
 92 APAC database who had at least one exam 12 weeks after the end of treatment registered in

93 GAL; and 3) those registered in the APAC database who had at least one exam 12 weeks after  
94 the end of the treatment registered in GAL and who had reached SVR.

95 Some criteria were used to make the analyzed groups more homogeneous and to  
96 promote greater internal validity: analyses separated by genotypes; evaluation of therapeutic  
97 schemes; treatment time; and results of qPCR-HCV tests evaluated after 12 weeks of treatment  
98 completion. We compared the proportions to assess whether the results were statistically  
99 significant. Pearson's chi-squared test was applied with a significance level of  $\alpha = 5\%$ . We used  
100 the odds ratio (OR) and confidence interval (CI) of 95% to identify the factors associated with  
101 SVR.

102 A bivariate analysis was conducted to assess the relationships between positive and  
103 negative responses to therapy and the available sociodemographic data, along with some of the  
104 comorbidities. For the multivariate analysis, we used the variables that presented a p-value <  
105 0.2 in the bivariate analysis. We identified collinearity in two variables using a correlation  
106 matrix, and variables that presented  $R^2 > 0.5$  were selected. Three different models were  
107 evaluated through the Akaike Information Criterion (AIC), and a multivariate model of logistic  
108 regression was defined to determine the independent association between SVR responses to  
109 therapy (cure vs no cure). These responses were defined by the results of the qPCR-HCV test  
110 as undetectable (SVR) or detectable (not SVR).

111 All statistical analyses were conducted using SPSS 20.0 for Windows, with a  
112 significance level of 0.05 (Table 2a e 2b). Statistical analyses and graphical representations  
113 were performed using the IBM-PASW Statistics version 18 and Microsoft Excel® 2013  
114 programs. Analysis and maps were developed utilizing RStudio, a free software program for  
115 an integrated development environment for R, version 1.2.5019-6 [20].

116 As mentioned before, this study utilized a historical database, and participants' names  
117 and personal information were kept confidential by substituting these data for an identification  
118 number (ID). As a result, the National Committee for Ethics in Research (CONEP) waived the  
119 requirement to obtain patients' informed written consent and approved the research, which is  
120 registered in Brazil under number 2,872,543.

## 121 **Results**

122 The SUS Department of Information Technology (DATASUS), through a project called  
123 VinculaSUS<sup>[19]</sup>, worked on establishing a relationship among the various Ministry of Health's  
124 databases by providing a numeric identification key (ID) which enables locating patients in  
125 these various information systems and facilitates researchers' analyses of policies adopted by  
126 the MoH-Brazil, while maintaining ethical commitments and the confidentiality of personal  
127 data. From this relationship, a unique numeric code (ID) was attributed to each patient and this  
128 code was replicated in the different databases to allow connecting the information taken from  
129 different sources.

130 During the analyzed period, 5 million ambulatory procedures were recorded in the  
131 SIA/SUS databases, including 30,423 patients treated for hepatitis C, of which 19,100 patients  
132 were registered with laboratory tests related to hepatitis C in the GAL database. Only 11,308  
133 of these patients had a viral load test performed 12 weeks after the end of treatment, allowing  
134 the assessment of SVR and confirming the cure of hepatitis C. Of these 11,308 patients, 10,758  
135 had a sustained virologic response and 550 individuals continued to present detectable qPCR-  
136 HCV following treatment (Figure 1).

137 When comparing proportions to assess whether the percentage differences per state  
138 among the three groups of patients were statistically significant, the states of the North,  
139 Northeast and Southeast regions presented the same proportion of cases (about 30%) in the  
140 three groups mentioned above ( $p$ -value  $>0.05$ ). The other states showed significant percentage



141 differences among the three groups ( $p$ -value  $< 0.05$ ). This is due to the high concentration of  
142 patients in the first group from the Southeast region, primarily from the state of São Paulo,  
143 which represented 21.3% of the total number of patients. Although the other two groups  
144 represent the majority of cases in the Southeast region, the final analyzed group show a higher  
145 concentration of treatments for the states along the South-Southeast axis, translating into a  
146 more heterogeneous group.

147 Georeferencing of the treated and cured cases was carried out and can be seen in Figure  
148 2, which shows the concentration of treatments in the South and Southeastern states.

149 **Figure 2.** Georeferencing of cases according to patients treated for hepatitis C, and patients  
150 who achieved viral cure, Brazil, 2015 to 2018.

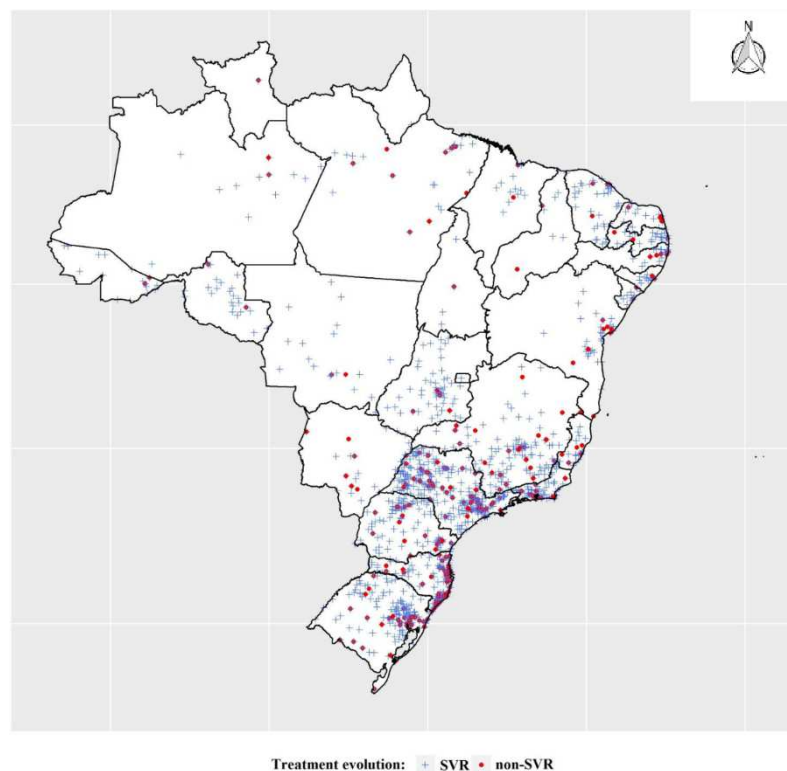

151  
152 Among the evaluated patients ( $n = 11,308$ ), 6,459 (57.1%) were male, 4,847 (42.9%)  
153 identified as white, 13,046 (65.8%) were between 50 and 69 years of age at the beginning of  
154 treatment, 8,686 (43.8%) lived in the Southeast region of the country, 4,983 (44.1%) had

155 genotype 1b, 9,494 (84.0%), and 1,810 (16.0%) underwent treatment for 12 weeks and 24  
156 weeks, respectively. More details are available in Table 1.

157 Table 1. Sociodemographic, clinical, and laboratory characteristics of patients who underwent  
158 hepatitis C treatment, from October 2015 to July 2018 in Brazil.

159

| Characteristics            | Patients         |      |
|----------------------------|------------------|------|
|                            | Total (N=11,308) |      |
|                            | N                | %    |
| <b>Sex</b>                 |                  |      |
| Male                       | 6459             | 57.1 |
| Female                     | 4847             | 42.9 |
| Ignored                    | 2                | 0.0  |
| <b>race / color</b>        |                  |      |
| White                      | 5464             | 48.3 |
| Black                      | 598              | 5.3  |
| Asian                      | 965              | 8.5  |
| Brown                      | 1217             | 10.8 |
| Indigenous                 | 5                | 0.0  |
| Ignored                    | 3059             | 27.1 |
| <b>age group</b>           |                  |      |
| 0 to 9                     | 0                | 0.0  |
| 10 to 19                   | 2                | 0.0  |
| 20 to 29                   | 71               | 0.6  |
| 30 to 39                   | 516              | 4.6  |
| 40 to 49                   | 1884             | 16.7 |
| 50 to 59                   | 3970             | 35.1 |
| 60 to 69                   | 3522             | 31.1 |
| Above 70                   | 1343             | 11.9 |
| <b>Region of Residence</b> |                  |      |
| North                      | 617              | 5.5  |
| Northeast                  | 825              | 7.3  |
| Southeast                  | 4983             | 44.1 |
| South                      | 4393             | 38.8 |
| Center-West                | 490              | 4.3  |
| <b>Genotypes</b>           |                  |      |
| Genotype 1                 | 56               | 0.5  |
| Genotype 1a                | 1674             | 14.8 |
| Genotype 1b                | 5395             | 47.7 |
| Genotype 2                 | 282              | 2.5  |
| Genotype 3                 | 1934             | 17.1 |
| Genotype 4                 | 42               | 0.4  |
| Mixed Genotypes            | 12               | 0.1  |
| Unknown                    | 1913             | 16.9 |
| <b>Treatment Time</b>      |                  |      |
| 12 weeks                   | 9554             | 84.5 |
| 24 weeks                   | 1752             | 15.5 |
| Unknown                    | 2                | 0.0  |

172

173

174

175 Among those with sustained virologic responses (SVR) or positive response to DAA with a  
 176 undetectable qPCR-HCV at the end of treatment, 6,060 (56.3%) were male; 5,179 (48.1%)  
 177 identified as white; 3,759 (34.9%) had initiated treatment at the age range of 50 to 59 years;  
 178 4,777 (44.4%) lived in the Southeast region; 5,215 (48.15%) carried genotype 1b; and 9,554  
 179 (85.5%) and 1,752 (15.5%) underwent treatment for 12 weeks and 24 weeks, respectively.  
 180 Treatment regimens for each of the different genotypes identified in the study were evaluated  
 181 to verify whether the different responses were statistically significant. Genotypes 1 (without  
 182 subtype results), 1a, 1b, 2, 3, 4 and some mixed genotypes were present in the analyses. The  
 183 average rate of SVR with the use of DAAs was 95.0% and 95.9% for 12 and 24 weeks after  
 184 treatment, respectively (Table 2a).

185 **Table 2A.** Demographic, clinical, and laboratory characteristics of patients, and factors  
 186 associated with SVR, bivariate and multivariate analyzes.

| SVR                        |                |     |                  |       |                    |                              |          |                       |             |          |
|----------------------------|----------------|-----|------------------|-------|--------------------|------------------------------|----------|-----------------------|-------------|----------|
| Characteristics            | No             |     | Yes              |       | Bivariate analysis |                              |          | Multivariate analysis |             |          |
|                            | Total (N= 550) |     | Total (N=10.758) |       | Odds Ratio         | Confidence Interval (CI) 95% | p-value  | Odds Ratio            | CI 95%      | p-value  |
|                            | N              | %   | N                | %     |                    |                              |          |                       |             |          |
| <b>Sex</b>                 |                |     |                  |       |                    |                              |          |                       |             |          |
| Male*                      | 399            | 6.2 | 6060             | 93.8  | -                  | -                            | -        | -                     | -           | -        |
| Female                     | 151            | 3.1 | 4696             | 96.9  | 0.5                | (0.4 ; 0.6)                  | < 0.0001 | 0.5                   | (0.4 ; 0.6) | < 0.0001 |
| Unknown                    | 0              | 0.0 | 2                | 100.0 | 0.0                | -                            | -        | 0.0                   | -           | -        |
| <b>Race / color</b>        |                |     |                  |       |                    |                              |          |                       |             |          |
| White*                     | 285            | 5.2 | 5179             | 94.8  | -                  | -                            | -        | -                     | -           | -        |
| Black                      | 23             | 3.8 | 575              | 96.2  | 0.7                | (0.5 ; 1.1)                  | 0.1492   | 0.8                   | (0.5 ; 1.3) | 0.4599   |
| Asian                      | 50             | 5.2 | 915              | 94.8  | 1.0                | (0.7 ; 1.4)                  | 0.9644   | 1.0                   | (0.7 ; 1.5) | 0.8774   |
| Brown                      | 60             | 4.9 | 1157             | 95.1  | 0.9                | (0.7 ; 1.3)                  | 0.6837   | 1.0                   | (0.7 ; 1.4) | 0.8939   |
| Indigenous                 | 0              | 0.0 | 5                | 100.0 | 0.0                | -                            | 0.7350   | 0.0                   | -           | 0.9893   |
| Unknown                    | 132            | 4.3 | 2927             | 95.7  | 0.8                | (0.7 ; 1.0)                  | 0.0648   | 0.9                   | (0.7 ; 1.1) | 0.2054   |
| <b>Age range</b>           |                |     |                  |       |                    |                              |          |                       |             |          |
| 10 to 19                   | 0              | 0.0 | 2                | 100.0 | 0.0                | -                            | 0.3587   | -                     | -           | -        |
| 20 to 29                   | 1              | 1.4 | 70               | 98.6  | 0.3                | (0.0 ; 2.3)                  | 0.2503   | -                     | -           | -        |
| 30 to 39*                  | 23             | 4.5 | 493              | 95.5  | -                  | -                            | -        | -                     | -           | -        |
| 40 to 49                   | 83             | 4.4 | 1801             | 95.6  | 1.0                | (0.6 ; 1.6)                  | 0.9595   | -                     | -           | -        |
| 50 to 59                   | 211            | 5.3 | 3759             | 94.7  | 1.2                | (0.8 ; 1.9)                  | 0.4105   | -                     | -           | -        |
| 60 to 69                   | 182            | 5.2 | 3340             | 94.8  | 1.2                | (0.7 ; 1.8)                  | 0.4929   | -                     | -           | -        |
| Above 70                   | 50             | 3.7 | 1293             | 96.3  | 0.8                | (0.5 ; 1.4)                  | 0.4660   | -                     | -           | -        |
| <b>Region of Residence</b> |                |     |                  |       |                    |                              |          |                       |             |          |

|                        |     |     |      |       |     |             |          |     |             |          |
|------------------------|-----|-----|------|-------|-----|-------------|----------|-----|-------------|----------|
| <b>North*</b>          | 37  | 6.0 | 580  | 94.0  | -   | -           | -        | -   | -           | -        |
| <b>Northeast</b>       | 48  | 5.8 | 777  | 94.2  | 1.0 | (0.6 ; 1.5) | 0.8867   | 0.9 | (0.5 ; 1.4) | 0.5730   |
| <b>Southeast</b>       | 206 | 4.1 | 4777 | 95.9  | 0.7 | (0.5 ; 1.0) | 0.0332   | 0.8 | (0.6 ; 1.3) | 0.3997   |
| <b>South</b>           | 243 | 5.5 | 4150 | 94.5  | 0.9 | (0.6 ; 1.3) | 0.6377   | 1.0 | (0.6 ; 1.4) | 0.8371   |
| <b>Center-West</b>     | 16  | 3.3 | 474  | 96.7  | 0.5 | (0.3 ; 1.0) | 0.0372   | 0.7 | (0.4 ; 1.3) | 0.2121   |
| <b>Genotypes</b>       |     |     |      |       |     |             |          |     |             |          |
| <b>1</b>               | 0   | 0.0 | 56   | 100.0 | 0.0 | -           | 0.3004   | 0.0 | -           | 0.9666   |
| <b>1a*</b>             | 62  | 3.7 | 1612 | 96.3  | -   | -           | -        | -   | -           | -        |
| <b>1b</b>              | 180 | 3.3 | 5215 | 96.7  | 0.9 | (0.7 ; 1.2) | 0.4705   | 0.9 | (0.6 ; 1.2) | 0.3538   |
| <b>2</b>               | 22  | 7.8 | 260  | 92.2  | 2.2 | (1.2 ; 3.6) | 0.0022   | 1.5 | (0.7 ; 2.9) | 0.2831   |
| <b>3</b>               | 181 | 9.4 | 1753 | 90.6  | 2.7 | (2.0 ; 3.6) | < 0.0001 | 2.8 | (2.0 ; 3.8) | < 0.0001 |
| <b>4</b>               | 1   | 2.4 | 41   | 97.6  | 0.6 | (0.1 ; 4.7) | 0.6553   | 0.6 | (0.1 ; 4.5) | 0.6200   |
| <b>Mixed genotypes</b> | 0   | 0.0 | 12   | 100.0 | 0.0 | -           | 0.9826   | 0.0 | -           | 0.9844   |
| <b>Unknown</b>         | 104 | 5.4 | 1809 | 94.6  | 1.5 | (1.1 ; 2.1) | 0.0143   | 1.2 | (0.9 ; 1.8) | 0.1968   |

187

188 In the odds ratio (OR) assessment, we verified that females are half as likely to have a negative  
189 response to therapy when compared to males (Table 2a).

190 In relation to the variable race/color, the rates did not present significantly different values for  
191 DAA-based therapies, with positive responses between 94.8 and 100%. The age group variable  
192 presented positive responses to treatment, varying from 94.7% to 100%; however, the p-value  
193 indicated no significant differences among the groups (Table 2a).

194 The positive response rate for the five Brazilian regions ranged from 94.0 to 96.7%, being  
195 significantly better in the Center-West and Southeast with an OR of 0.5 and 0.7, respectively  
196 ( $p < 0,05$ ). SVR proportion ranged from 90.6% (genotype 3) to 100% (genotype 1). Some  
197 patients (12) were classified as infected by two different genotypes (mixed genotypes) and the  
198 SVR proportion was 100%. Patients with genotypes 2 and 3 obtained the lowest SVR  
199 proportion: 92.2% and 90.6%, respectively. When results were assessed according to  
200 genotypes, patients with genotypes 2 and 3 were 1.5 and 2.8 more likely to not have SVR,  
201 respectively, when compared to genotype 1a and 1b (Table 2b and Figure 3). These results  
202 were confirmed by the bivariate and multivariate analyses (Table 2a and 2b).

203 The treatment of genotype 1a and 1b reached results of 96.3 and 96.7%, respectively. For 56  
204 patients with genotype 1, there were no records of the subgenotype (1a and 1b). These patients  
205 had a 100% positive response rate to therapy (Table 2a and Figure 3).

206 **Figure 3.** HCV qPCR results, 12 weeks after treatment for HCV, according to regimen and  
207 genotype, Brazil, 2015 to 2018.

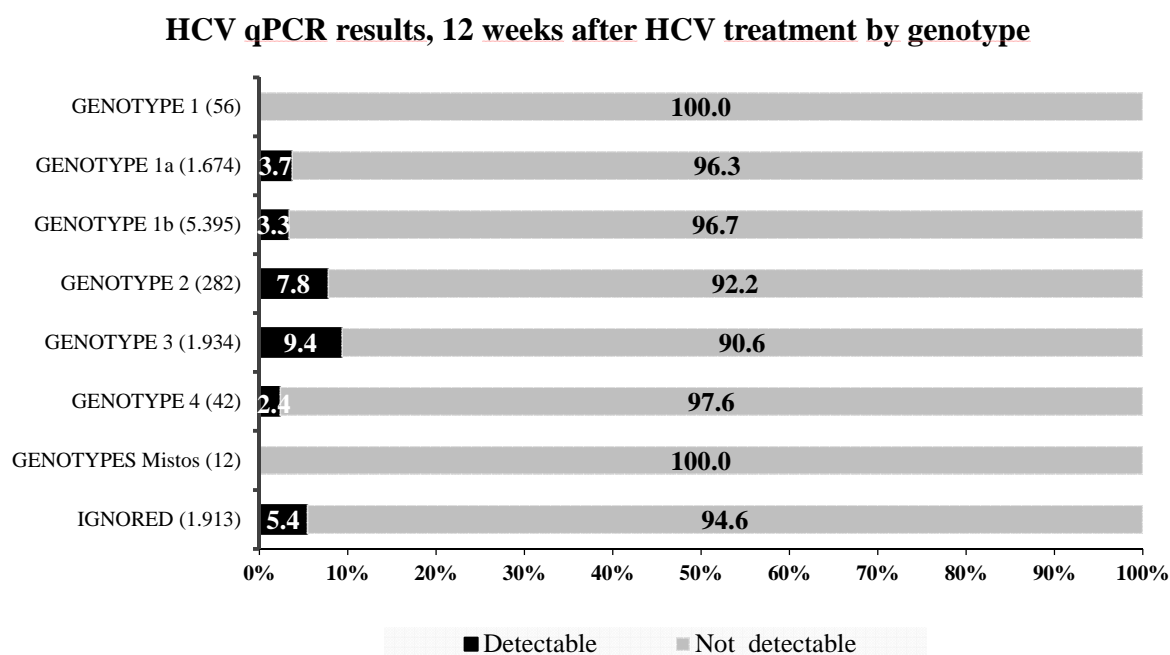

208

209

210 In relation to the different therapeutic regimens assessed, the positive response rate or  
211 SVR ranged from 72.4 to 100%. The response rate for the PEG+RBV regimen was  
212 significantly negative when compared to the other schemes, with an OR of 7.5 ( $p < 0.0001$ ). The  
213 least efficient regimen was SOF+SMV, with an OR of 1.4. We found no differences between  
214 treatment time of 12 and 24 weeks (Table 2).

215 When observing the data by therapeutic scheme, the results of SVR after 12 weeks of  
216 DAA-based treatment ranged from 92.2% (Sofosbuvir + RBV) to 100% (3D + Ribavirin)  
217 (Table 2 and Figure 4)

218 **Figure 4.** HCV qPCR results, 12 weeks after treatment for HCV, according to therapeutic  
219 scheme.

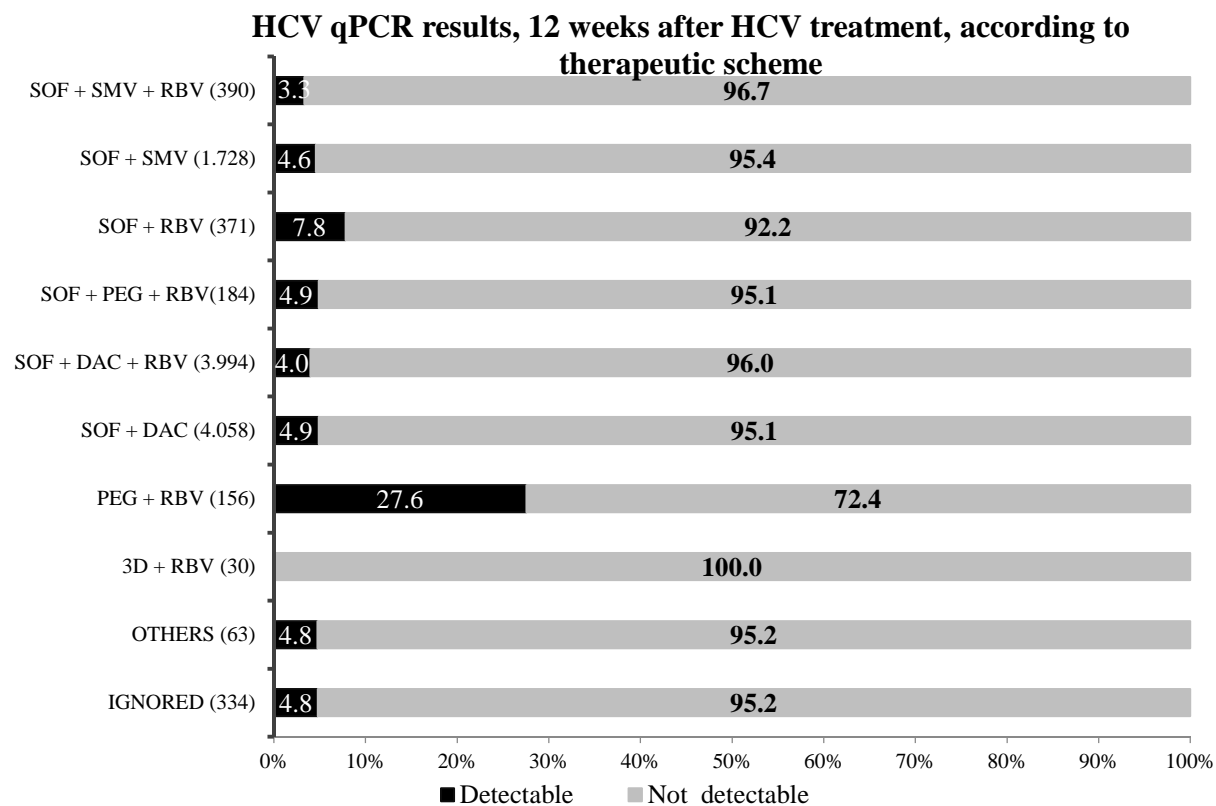

221 Patients with records of any of the comorbidities detailed in Table 2b had their  
222 information analyzed (7,588 registers). The response rate ranged from 83.3% (cirrhosis /child-  
223 Pugh A) to 97,9% (CKD- Chronic Kidney Disease); however, when the bivariate analysis was  
224 conducted, only the variable “presence of neoplasm” showed a significant result, with an OR  
225 of 1.8, that is, patients with neoplasms are nearly twice more likely to not reach a cure than  
226 patients without this comorbidity ( $p < 0,0003$ ) (Table 2b).

227 **Table 2B.** Demographic, clinical, and laboratory characteristics of patients, and factors  
228 associated with SVR, bivariate and multivariate analyzes.

229

230

| SVR                        |                |      |                  |       |                    |                              |          |                       |              |          |
|----------------------------|----------------|------|------------------|-------|--------------------|------------------------------|----------|-----------------------|--------------|----------|
| Characteristics            | No             |      | Yes              |       | Bivariate analysis |                              |          | Multivariate analysis |              |          |
|                            | Total (N= 550) |      | Total (N=10.758) |       | Odds Ratio         | Confidence Interval (CI) 95% | p-value  | Odds Ratio            | CI 95%       | p-value  |
|                            | N              | %    | N                | %     |                    |                              |          |                       |              |          |
| <b>Therapeutic scheme</b>  |                |      |                  |       |                    |                              |          |                       |              |          |
| 3D + RBV                   | 0              | 0.0  | 30               | 100.0 | 0.0                | -                            | 0.4212   | 0.0                   | -            | 0.9757   |
| PEG + RBV                  | 43             | 27.6 | 113              | 72.4  | 7.4                | (5.1 ; 10.8)                 | < 0.0001 | 7.5                   | (5.0 ; 11.2) | < 0.0001 |
| SOFO + DCV*                | 199            | 4.9  | 3859             | 95.1  | -                  | -                            | -        | -                     | -            | -        |
| SOF + DCV +RBV             | 159            | 4.0  | 3835             | 96.0  | 0.8                | (0.6 ; 1.0)                  | 0.0449   | 0.8                   | (0.6 ; 0.9)  | 0.0094   |
| SOFO + PEG + RBV           | 9              | 4.9  | 175              | 95.1  | 1.0                | (0.5 ; 2.0)                  | 0.9938   | 0.5                   | (0.2 ; 1.0)  | 0.0369   |
| SOF + RBV                  | 29             | 7.8  | 342              | 92.2  | 1.6                | (1.1 ; 2.5)                  | 0.0161   | 1.4                   | (0.8 ; 2.5)  | 0.2218   |
| SOF + SMV                  | 79             | 4.6  | 1649             | 95.4  | 0.9                | (0.7 ; 1.2)                  | 0.5888   | 1.3                   | (1.0 ; 1.8)  | 0.0484   |
| SOF + SMV + RBV            | 13             | 3.3  | 377              | 96.7  | 0.7                | (0.4 ; 1.2)                  | 0.1671   | 1.0                   | (0.5 ; 1.7)  | 0.9092   |
| Unknown                    | 16             | 4.8  | 318              | 95.2  | 1.0                | (0.6 ; 1.6)                  | 0.9264   | 1.0                   | (0.6 ; 1.8)  | 0.8644   |
| Others                     | 3              | 4.8  | 60               | 95.2  | 1.0                | (0.3 ; 3.1)                  | 0.9587   | 1.2                   | (0.4 ; 3.9)  | 0.7585   |
| <b>Time of treatment</b>   |                |      |                  |       |                    |                              |          |                       |              |          |
| 12 weeks*                  | 479            | 5.0  | 9075             | 95.0  | -                  | -                            | -        | -                     | -            | -        |
| 24 weeks                   | 71             | 4.1  | 1681             | 95.9  | 0.8                | (0.6 ; 1.0)                  | 0.0862   | 0.8                   | (0.6 ; 1.1)  | 0.1973   |
| Unknown                    | 0              | 0.0  | 2                | 100.0 | 0.0                | -                            | 0.3904   | 0.0                   | -            | 0.9935   |
| <b>Comorbidities</b>       |                |      |                  |       |                    |                              |          |                       |              |          |
| <b>Neoplasm</b>            |                |      |                  |       |                    |                              |          |                       |              |          |
| Yes*                       | 48             | 8.0  | 551              | 92.0  | 1.8                | (1.3 ; 2.4)                  | 0.0003   | 1.7                   | (1.2 ; 2.3)  | 0.0015   |
| No                         | 502            | 4.7  | 10207            | 95.3  | 1.0                | (0.9 ; 1.1)                  | 1.0000   | 1.0                   | (0.9 ; 1.1)  | 1.0000   |
| <b>HIV</b>                 |                |      |                  |       |                    |                              |          |                       |              |          |
| Yes*                       | 70             | 4.6  | 1461             | 95.4  | -                  | -                            | -        | -                     | -            | -        |
| No                         | 480            | 4.9  | 9299             | 95.1  | 1.1                | (0.8 ; 1.4)                  | 0.5695   | -                     | -            | -        |
| <b>Fibrosis/Cirrhosis</b>  |                |      |                  |       |                    |                              |          |                       |              |          |
| Yes*                       | 171            | 4.6  | 3551             | 95.4  | -                  | -                            | -        | -                     | -            | -        |
| No                         | 379            | 5.0  | 7209             | 95.0  | 1.1                | (0.9 ; 1.3)                  | 0.3524   | -                     | -            | -        |
| <b>Child -Pugh A</b>       |                |      |                  |       |                    |                              |          |                       |              |          |
| Yes*                       | 1              | 16.7 | 5                | 83.3  | -                  | -                            | -        | -                     | -            | -        |
| No                         | 549            | 4.9  | 10755            | 95.1  | 0.3                | (0.0 ; 2.2)                  | 0.2129   | -                     | -            | -        |
| <b>Child-Pugh BC</b>       |                |      |                  |       |                    |                              |          |                       |              |          |
| Yes*                       | 1              | 3.3  | 29               | 96.7  | -                  | -                            | -        | -                     | -            | -        |
| No                         | 549            | 4.9  | 10731            | 95.1  | 1.5                | (0.2 ; 10.9)                 | 0.6984   | -                     | -            | -        |
| <b>Fibrosis</b>            |                |      |                  |       |                    |                              |          |                       |              |          |
| Yes*                       | 7              | 4.5  | 150              | 95.5  | -                  | -                            | -        | -                     | -            | -        |
| No                         | 543            | 4.9  | 10610            | 95.1  | 1.1                | (0.5 ; 2.4)                  | 0.8126   | -                     | -            | -        |
| <b>HBV</b>                 |                |      |                  |       |                    |                              |          |                       |              |          |
| Yes*                       | 5              | 4.0  | 119              | 96.0  | -                  | -                            | -        | -                     | -            | -        |
| No                         | 545            | 4.9  | 10641            | 95.1  | 1.2                | (0.5 ; 3.0)                  | 0.6659   | -                     | -            | -        |
| <b>Diabetes</b>            |                |      |                  |       |                    |                              |          |                       |              |          |
| Yes*                       | 6              | 7.0  | 80               | 93.0  | -                  | -                            | -        | -                     | -            | -        |
| No                         | 544            | 4.8  | 10680            | 95.2  | 0.7                | (0.3 ; 1.6)                  | 0.3633   | -                     | -            | -        |
| <b>CKD</b>                 |                |      |                  |       |                    |                              |          |                       |              |          |
| Yes*                       | 3              | 2.1  | 138              | 97.9  | -                  | -                            | -        | -                     | -            | -        |
| No                         | 547            | 4.9  | 10622            | 95.1  | 2.4                | (0.8 ; 7.5)                  | 0.1406   | -                     | -            | -        |
| <b>Portal hypertension</b> |                |      |                  |       |                    |                              |          |                       |              |          |
| Yes*                       | 1              | 5.9  | 16               | 94.1  | -                  | -                            | -        | -                     | -            | -        |
| No                         | 549            | 4.9  | 10744            | 95.1  | 0.8                | (0.1 ; 6.2)                  | 0.8452   | -                     | -            | -        |
| <b>Transplanted</b>        |                |      |                  |       |                    |                              |          |                       |              |          |
| Yes*                       | 9              | 4.2  | 204              | 95.8  | -                  | -                            | -        | -                     | -            | -        |
| No                         | 541            | 4.9  | 10556            | 95.1  | 1.2                | (0.6 ; 2.3)                  | 0.6626   | -                     | -            | -        |

231 Bivariate and multivariate analyses showed that genotypes 1a and 1b presented  
232 significantly different results when compared to others, responding better to therapeutic  
233 schemes. Genotypes 2 and 3, on the other hand, responded less to treatments when compared  
234 to genotype 1a and 1b. Genotype 4 had an SVR of 97.6%, but presented no significant  
235 difference due to the small number of cases. In the evaluation, it was observed that the SOF +  
236 RBV scheme had a significantly lower response to HCV (SVR 92.2%; OR 1.6; IC 95% 1,1-  
237 2.5) along with PEG + RBV (SVR 72.4%; OR 7.4; CI 5.1-10.8). We also verified that the SOF  
238 + DCV + RBV scheme yielded a higher response than the other antivirals (SVR 96%; OR 0.8;  
239 CI 0.6 -1.0). The SVR of 3D+RBV was 100% (Table 2b).

240 Table 3 shows the SVR rates according to the various therapeutic regimens and genotypes (1,  
241 1a, 1b, 2, 3, and 4).

242 When the results of treatments for each genotype were analyzed, we confirmed that the best  
243 SVR rates were reached by using SOF+DAC (+/-) RBV therapeutic regimens. The same was  
244 true for patients carrying genotypes 1a and 1b, whose SVR rates ranged from 96.5 to 97.7%  
245 (IC 95-98.2%).

246 **Table 3.** HCV qPCR results following 12 weeks of treatment for hepatitis C for 11,308 patients  
247 in Brazil, according to the therapeutic scheme and patients' genotype.

| Therapeutic scheme   | Patients (N) | %       | Genotypes       | SVR    |         |
|----------------------|--------------|---------|-----------------|--------|---------|
|                      |              |         |                 | No (%) | Yes (%) |
| PEG+ RBV             | 18           | 0.2%    | genotype 1a     | 38.9   | 61.1    |
|                      | 40           | 0.4%    | genotype 1b     | 35     | 65      |
|                      | 5            | 0.0%    | genotype 2      | 40     | 60      |
|                      | 25           | 0.2%    | genotype 3      | 32     | 68      |
|                      | 68           | 0.6%    | ignored         | 17.6   | 82.4    |
| 3D + RBV<br>with DAA | 4            | 0.0%    | genotype 1a     | -      | 100     |
|                      | 26           | 0.2%    | genotype 1b     | -      | 100     |
| SOF+DAC              | 18           | 0.2%    | genotype 1      | -      | 100     |
|                      | 604          | 5.3%    | genotype 1a     | 3.5    | 96.5    |
|                      | 1899         | 16.8%   | genotype 1b     | 2.5    | 97.5    |
|                      | 20           | 0.2%    | genotype 2      | 5      | 95      |
|                      | 782          | 6.9%    | genotype 3      | 11.9   | 88.1    |
|                      | 31           | 0.3%    | genotype 4      | 3.2    | 96.8    |
|                      | 6            | 0.1%    | Mixed genotypes | -      | 100     |
| 698                  | 6.2%         | ignored | 5               | 95     |         |
| SOF+DAC+RBV          | 18           | 0.2%    | genotype 1      | -      | 100     |



|                        |      |       |                 |      |      |
|------------------------|------|-------|-----------------|------|------|
|                        | 610  | 5.4%  | genotype 1a     | 2.3  | 97.7 |
|                        | 1753 | 15.5% | genotype 1b     | 2.7  | 97.3 |
|                        | 9    | 0.1%  | genotype 2      | -    | 100  |
|                        | 893  | 7.9%  | genotype 3      | 7.3  | 92.7 |
|                        | 8    | 0.1%  | genotype 4      | -    | 100  |
|                        | 4    | 0.0%  | Mixed genotypes | -    | 100  |
|                        | 699  | 6.2%  | ignored         | 4.6  | 95.4 |
| <b>SOF+PEG-RBV</b>     | 8    | 0.1%  | genotype 2      | 12.5 | 87.5 |
|                        | 146  | 1.3%  | genotype 3      | 4.1  | 95.9 |
|                        | 30   | 0.3%  | ignored         | 6.7  | 93.3 |
| <b>SOF+RBV</b>         | 14   | 0.1%  | genotype 1a     | 7.1  | 92.9 |
|                        | 60   | 0.5%  | genotype 1b     | 3.3  | 96.7 |
|                        | 225  | 2.0%  | genotype 2      | 7.6  | 92.4 |
|                        | 26   | 0.2%  | genotype 3      | 11.5 | 88.5 |
|                        | 46   | 0.4%  | ignored         | 13   | 87   |
| <b>SOF+SMV</b>         | 10   | 0.1%  | genotype 1      | -    | 100  |
|                        | 289  | 2.6%  | genotype 1a     | 5.5  | 94.5 |
|                        | 1147 | 10.1% | genotype 1b     | 4.4  | 95.6 |
|                        | 3    | 0.0%  | genotype 2      | -    | 100  |
|                        | 3    | 0.0%  | genotype 3      | -    | 100  |
|                        | 2    | 0.0%  | Mixed genotypes | -    | 100  |
|                        | 274  | 2.4%  | ignored         | 4.7  | 95.3 |
| <b>SOF+SMV+RBV</b>     | 6    | 0.1%  | genotype 1      | -    | 100  |
|                        | 84   | 0.7%  | genotype 1a     | 3.6  | 96.4 |
|                        | 246  | 2.2%  | genotype 1b     | 4.1  | 95.9 |
|                        | 54   | 0.5%  | ignored         | -    | 100  |
| <b>unknown therapy</b> | 3    | 0.0%  | genotype 1      | -    | 100  |
|                        | 36   | 0.3%  | genotype 1a     | -    | 100  |
|                        | 197  | 1.7%  | genotype 1b     | 4.1  | 95.9 |
|                        | 11   | 0.1%  | genotype 2      | -    | 100  |
|                        | 51   | 0.5%  | genotype 3      | 11.8 | 88.2 |
|                        | 1    | 0.0%  | genotype 4      | -    | 100  |
|                        | 35   | 0.3%  | ignored         | 5.7  | 94.3 |
| <b>other therapies</b> | 1    | 0.0%  | genotype 1      | -    | 100  |
|                        | 15   | 0.1%  | genotype 1a     | -    | 100  |
|                        | 27   | 0.2%  | genotype 1b     | -    | 100  |
|                        | 1    | 0.0%  | genotype 2      | 100  |      |
|                        | 8    | 0.1%  | genotype 3      | -    | 100  |
|                        | 2    | 0.0%  | genotype 4      | -    | 100  |
|                        | 9    | 0.1%  | ignored         | 22.2 | 77.8 |

248

249

## 250 Discussion

251 About 11,308 patients had a viral load test performed 12 weeks after the end of  
 252 treatment. The average rate of SVR with the use of DAAs was 95.0% and 95.9% for 12 and 24  
 253 weeks after treatment, respectively. It is important to highlight that the study cohort had a large  
 254 number of patients with advanced fibrosis, cirrhosis, or comorbidities, which is consistent with  
 255 the treatment protocol used from 2015 to 2018. The rates of SVR were very satisfactory,  
 256 demonstrating that the treatment reached a high cure rate with an average of 95.5% with DAA

257 incorporated into SUS (87% to 100%), being the largest study carried out to date in Latin  
258 America. Similar data were found in other studies <sup>[9,19,20]</sup>.

259 Treatment schemes in each of the different genotypes identified in the study were  
260 evaluated to compare whether the different responses were statistically significant. Among  
261 those with sustained virologic responses (SVR), 56.3% were male; 48.1% identified as white;  
262 34.9% had initiated treatment between 50 to 59 years of age; 44.4% lived in the Southeast  
263 region; 48.15% carried genotype 1b; and 85.5 % underwent treatment for 12 weeks. Genotypes  
264 1 (without subtype results) 1a, 1b, 2, 3, 4 and some mixed genotypes were present in the  
265 analyses. Patients with genotypes 1a and 1b showed better cure rates than others (Table 2a).  
266 We also verified that treatments utilizing PEG + RBV resulted in an SVR of 72.4% and those  
267 that were DAA-based, such as 3D + RBV; SOFO + DCV +/- RBV; SOFO + PEG + RBV; SOF  
268 + RBV; SOF + SMV +/- RBV, obtained SVR rates ranging from 92.2 to 100%.

269 The analyses of the sociodemographic data showed that being a woman aged between  
270 20 and 49 years and residing in the Southeast and Center-West regions were predictors of a  
271 better response to DAA-based therapies (Table 2a). The age range 50 to 69 years yielded a  
272 slightly lower response to DAAs when compared to other age groups (SVR of 94.8%), although  
273 this finding was not confirmed in the bivariate analysis, and the multivariate model could not  
274 be conducted (Table 2a). A large retrospective cohort study with about 17,500 patients with  
275 HCV, grouped into six age groups (<55 years of age, 55-59, 60-64, 65-69, 70-74, 75 years of  
276 age) and treated with DAA-based therapies in 2014/2015 found high SVR rates ranging from  
277 90 to 94%, similar to those found in our study. It is worth highlighting that advanced age was  
278 not a predictor for a negative response, but rather the presence of cirrhosis. It is probable that  
279 in our cohort, people of more advanced age – being the largest group – had cirrhosis or  
280 neoplasms and that may have influenced the relatively lower SVR rates for this age group.  
281 However, when the factor age was analyzed independently, it was not a predictor of a lower

282 SVR in relation to other age groups, according to other published studies <sup>[23–25]</sup>. The positive  
283 response rate in the five regions of the country ranged from 94.0 to 96.7%, being significantly  
284 better in the Center-West and Southeast, with an OR of 0.5 and 0.7, respectively. These finding  
285 are difficult to interpret, although quality of life and access to healthcare in these regions may  
286 contribute to a better regional response to DAAs. The state of São Paulo accounts for a large  
287 representation of patients in the Southeast region and this state is known as having a good  
288 public healthcare system. On the other hand, other conditions influencing the achievement or  
289 not of SVR are discussed in depth throughout this study.

290 The best therapeutic results for genotype 1a and 1b, utilizing these regimens, ranged from 96.3  
291 to 96.7%, respectively. Patients with genotypes 2 and 3 obtained the lowest SVR rates (92.2%  
292 and 90.6%, respectively) and were 1.5 and 2.8 more likely to not have SVR, respectively, when  
293 compared to genotype 1a and 1b, a finding that has been confirmed in other studies <sup>[19, 20, 21, 22,</sup>  
294 <sup>23, 24, 25]</sup>. Genotype 4 had an SVR of 97.6%, an excellent result, but the difference cannot be  
295 established as significant due to the small number of cases. Ferreira and collaborators evaluated  
296 296 patients in the South region, obtaining SVR rates of 92% <sup>[16]</sup>. Another study including  
297 1,002 patients treated for HCV, with genotypes 1, 2 and 3, also carried out in the South region  
298 by Holzmann et al, found that even patients with liver cirrhosis achieved SVR rates ranging  
299 from 88.5% to 100% <sup>[27]</sup>. In another study, in which 219 patients underwent therapy with DAAs,  
300 a high rate of SVR and excellent drug tolerability were found. Failure to achieve SVR was  
301 observed mainly among patients with at least one negative response predictor: cirrhosis and/or  
302 genotypes 2 or 3 <sup>[16]</sup>. Other studies carried out in the Southeast region yielded similar data  
303 <sup>[18,19,20, 21,29,30]</sup>.

304 This study showed that the SOF + RBV scheme had a significantly lower response to HCV  
305 (SVR 92.2%; OR 1.6; CI 95% 1.1-2.5) along with PEG + RBV (SVR 72.4%; OR 7.4; CI 5.1-  
306 10.8). We also verified a higher response for the SOF + DCV + RBV scheme than for other

307 antivirals (SVR 96%; OR 0.8; CI 0.6 -1.0). The SOF+SMV regimen, with an SVR of 95.6%,  
308 yielded values that were very similar to SOF+DCV (95.1%); The addition of RBV to both  
309 schemes increased the rates to 96.7% and 96%, respectively (Table 2b). However, in the  
310 multivariate analyses, the SOF+SMV scheme proved to be less effective than SOF+DCV (OR  
311 1.3), results that have also been corroborated in other studies <sup>[31,32]</sup>.

312 Although the SVR of 3D + RBV was 100%, we were not able to verify whether this result was  
313 significant due to the small number of treated patients (Table 2b).

314 The high cure rate after using the therapeutic schemes considered in this study, with data from  
315 all Brazilian states, has great relevance to demonstrate that public policies developed by the  
316 Brazilian Ministry of Health, including the incorporation of therapies requiring large  
317 investments, providing cure for thousands of hepatitis C patients, has brought Brazil closer to  
318 the goal of eliminating the disease as a public health hazard, and over 140,000 people have  
319 been treated to date. This study can help to understand the dynamics of response to therapy in  
320 the Brazilian population. The average positive response with the use of DAAs ranged from  
321 95.0% to 95.9%, demonstrating that it is possible to obtain good results with therapies for  
322 hepatitis C in the public health system.

### 323 **Limitations**

324 This study was conducted using, initially, secondary data collected from the Ministry  
325 of Health's information systems (DATASUS). However, in order to collect data, it was  
326 necessary to work with several independent areas of that institution, as there is no interface  
327 between the different systems. Therefore, investments to increase the performance of the  
328 Ministry's systems – in charge of so many diseases – would facilitate research and permit more  
329 efficient analyses of data by managers at all levels (municipalities, states, and the federal  
330 government).

331           Although around 80,000 treatments were distributed throughout the period of this study,  
332 when the databases were merged, only 29,033 patients were found in the GAL database for  
333 undergoing some hepatitis C exam while also being registered in other databases related to the  
334 treatment of Hepatitis C (SIASUS - BPAI and APAC). Of these, 19,100 (66%) had qPCR-  
335 HCV in the GAL, but only 11,308 (~60%) had qPCR-HCV after 12 weeks of treatment for  
336 hepatitis C (Figure 2). Therefore, it can be inferred that most patients may have undergone  
337 testing through Supplementary Health Care (Health Insurance Plans) or bore the costs of  
338 laboratory tests themselves, and therefore, were not included in the GAL system database.

339 Among the main limitations to this study, the incompleteness of data in all systems stands out.  
340 The main data refer to results of viral genotype; race/color; and comorbidities (Tables 1 and 2).  
341 The study was conducted with secondary data that did not always adequately control  
342 confounding factors. The absence of sociodemographic data (resulting from poorly filled out  
343 forms), such as information about race/color (27%) is common in the various SUS databases  
344 (e.g.: GAL and Sinan- Notifiable Diseases Information System).

345 In the evaluated age groups, we found some differences in the SVR rate, but this was not  
346 confirmed by the bivariate analyses. SVR rates varied from 98.6 to 100% in the age group  
347 between 10 and 29 years. This indicates that there is a better response to therapy among  
348 younger populations; however, the number of patients assessed was small (73) and this positive  
349 difference in SVR could not be confirmed in the statistical models.

350 In relation to comorbidities, there were 7,588 registers; for the remaining patients (3,720), this  
351 variable had been left blank (absent information), a fact that may cause a bias of information  
352 as this information was absent for about 30% of the patients in this cohort. It is true that the  
353 guidelines in that period restricted SUS treatment for patients with hepatitis C who had  
354 advanced fibrosis (stages 3, 4) or those who presented some type of comorbidity. Although

355 some comorbidities are known for their negative response to therapies, such as the presence of  
356 decompensated cirrhosis, the assessed data did not show significant differences in the SVR.  
357 This could be intrinsically related to incorrect or absent data, which may interfere in the  
358 analyses and increase bias, as mentioned above. Data related to comorbidities are exclusively  
359 filled out in spreadsheets and sent to the Ministry of Health; they are not included in the  
360 SIASUS system as are the others.

361 The only comorbidity that yielded a significantly negative difference when compared to the  
362 others (Table 2), was the presence of neoplasms (SVR of 92%; OR-1,8; p-value <0,0003). This  
363 result for people with some types of neoplasm was similar to the findings in another study<sup>[33]</sup>.  
364 It is important to note that, even with a poorer result when compared to others, the SVR rates  
365 are still excellent and the benefit of treating people with neoplasms is positively reported in  
366 literature, with a rate of 92% viewed as very satisfactory.<sup>[24,25,34]</sup>

367

368

## 369 **Conclusion**

370 Even without obtaining data for all patients initially located in the SIA/SUS, it is possible to  
371 conclude that the data in this study obtained excellent results, consistent with the study  
372 performed. Brazil is also a signatory to the World Health Organization resolution and has a  
373 National Plan for the Elimination of Hepatitis C as a public health hazard by 2030. One of the  
374 main goals of this plan is to offer more diagnosis and treatment for 50,000 people annually, by  
375 2025<sup>[13, 36]</sup>. Our work shows that the incorporation of DAAs was of prime importance to  
376 achieve high cure rates in the studied population and highlights the importance of monitoring  
377 treatments and achieving virologic cure. The Brazilian Public Health System must be included

378 among the public institutions that offer treatments to its population in a universal and  
379 egalitarian way.

380 Currently, new treatments are being incorporated into SUS, with other drugs that are as good  
381 or better than the ones we studied. Our study demonstrates that the excellent results obtained  
382 in curing patients with hepatitis C may have even better results in the future. This is  
383 significantly important, confirming the excellent results of the treatment of hepatitis C in the  
384 national territory and the need to maintain treatment for the elimination of hepatitis C as a  
385 public health problem by 2030 [5,14, 36].

## 386 **Acknowledgements**

387 We would like to acknowledge all of the support provided in the preparation and  
388 publication of this study, Brazil's Ministry of Health, DATASUS and the Department of  
389 Chronic Conditions Diseases, and other Sexually Transmitted Infections/the Ministry of  
390 Health, teams who made this study possible.

## 391 **Authors' contributions**

392 **Conceptualization:** SMV, WNA; **Data search:** SMV, RAR, WNA; **Investigation:** SMV,  
393 RAR, WNA; **Project administration:** SMV, WNA; **Methodology:** SMV, WNA, RAR,  
394 **Supervision:** SMV, WNA; **Validation:** SMV, RAR, GMJr, KCT, GFMP; **Writing:** SMV,  
395 RAR, GMJr, GFMP, KCT; WNA; **Writing-review & editing:** SMV, RAR, GFMP, GMJr,  
396 KCT, WNA

## 397 **References**

- 398 1. WORLD HEALTH ORGANIZATION. GLOBAL HEPATITIS REPORT, 2017. World Heal Organ.  
399 Geneve; 2017. Recuperado: [http://apps.who.int/iris/bitstream/handle/10665/255016/9789241565455-](http://apps.who.int/iris/bitstream/handle/10665/255016/9789241565455-eng.pdf?sequence=1)  
400 [eng.pdf?sequence=1](http://apps.who.int/iris/bitstream/handle/10665/255016/9789241565455-eng.pdf?sequence=1)
- 401 2. Blach S, Zeuzem S, Manns M, Altraif I, Duberg AS, Muljono DH, et al. Global prevalence and

- 402 genotype distribution of hepatitis C virus infection in 2015: A modelling study. *Lancet Gastroenterol*  
403 *Hepatol.* 2017;2: 161–176. doi:10.1016/S2468-1253(16)30181-9
- 404 3. World Health Organization. Progress report on access to hepatitis C treatment: focus on overcoming  
405 barriers in low- and middle-income countries. World Heal Organ. Geneva; 2018. Recuperado:  
406 <https://www.who.int/hepatitis/publications/hep-c-access-report-2018/en/>
- 407 4. Spearman CW, Dusheiko GM, Hellard M, Sonderup M. Hepatitis C. *Lancet.* 2019;394: 1451–1466.  
408 doi:10.1016/S0140-6736(19)32320-7
- 409 5. Benzaken AS, Girade R, Catapan E, Pereira GFM, de Almeida EC, Vivaldini S, et al. Hepatitis C  
410 disease burden and strategies for elimination by 2030 in Brazil. A mathematical modeling approach.  
411 *Brazilian J Infect Dis.* 2019;23: 182–190. doi:10.1016/j.bjid.2019.04.010
- 412 6. Benzaken AS, Girade R, Catapan E, Pereira GFM, de Almeida EC, Vivaldini S, et al. Hepatitis C  
413 disease burden and strategies for elimination by 2030 in Brazil. A mathematical modeling approach.  
414 *Brazilian J Infect Dis.* 2019;23: 182–190. doi:10.1016/j.bjid.2019.04.010
- 415 7. Ministério da Saúde-Brasil. Protocolo Clínico e Diretrizes Terapêuticas para Hepatite C e Coinfecções.  
416 2015 p. 1–98. Recuperado:  
417 [http://bvsmms.saude.gov.br/bvs/publicacoes/protocolo\\_clinico\\_diretrizes\\_hepatite\\_co\\_coinfeccoes.pdf](http://bvsmms.saude.gov.br/bvs/publicacoes/protocolo_clinico_diretrizes_hepatite_co_coinfeccoes.pdf)
- 418 8. Brasil. Ministério da Saúde. Protocolo Clínico e Diretrizes Terapêuticas para Hepatite C e Coinfecções.  
419 *Protoc Clínico e Diretrizes Ter para Hepat C e Coinfecções.* Brasília, Brasil; 2015.  
420 doi:10.1017/CBO9781107415324.004
- 421 9. Id WL, Lin Y, Chang C, Chang C. Impact of direct-acting antiviral therapy for hepatitis C – related  
422 hepatocellular carcinoma. *PLOS ONE J.* 2020; 80–90. doi:10.1371/journal.pone.0233212
- 423 10. Gallach M, Vergara M, da Costa JP, Miquel M, Casas M, Sanchez-Delgado J, et al. Impact of treatment  
424 with direct-acting antivirals on anxiety and depression in chronic hepatitis C. *PLoS One.* 2018;13: 1–15.  
425 doi:10.1371/journal.pone.0208112
- 426 11. Gastaldi G, Gomes D, Schneiter P, Montet X, Tappy L, Clément S, et al. Treatment with direct-acting  
427 antivirals improves peripheral insulin sensitivity in nondiabetic, lean chronic hepatitis C patients. *PLoS*  
428 *One.* 2019;14: 1–17. doi:10.1371/journal.pone.0217751
- 429 12. Juanbeltz R, Martínez-Baz I, San Miguel R, Goñi-Esarte S, Cabasés JM, Castilla J. Impact of successful



- 430 treatment with directacting antiviral agents on health-related quality of life in chronic hepatitis C  
431 patients. *PLoS One*. 2018;13: 1–15. doi:10.1371/journal.pone.0205277
- 432 13. Roche B, Coilly A, Duclos-Vallee JC, Samuel D. The impact of treatment of hepatitis C with DAAs on  
433 the occurrence of HCC. *Liver Int*. 2018;38: 139–145. doi:10.1111/liv.13659
- 434 14. Ministério da Saúde B. Protocolo Clínico E Diretrizes Terapêuticas Para Hepatite C e Coinfecções.  
435 Brasília; 2018.
- 436 15. Brasil. Ministério da Saúde. Plano para Eliminação da Hepatite C no Brasil. Brasília; 2018. Recuperado:  
437 [www.aids.gov.br](http://www.aids.gov.br)
- 438 16. Castelo A, Brandão Mello CE, Teixeira R, Madruga JVR, Reuter T, Pereira LMMB, et al. Hepatitis C in  
439 the Brazilian public health care system: Burden of disease. *Arq Gastroenterol*. 2018;55: 329–337.  
440 doi:10.1590/s0004-2803.201800000-74
- 441 17. Perazzo H, Jorge MJ, Silva JC, Avellar AM, Silva PS, Romero C, et al. Micro-costing analysis of  
442 guideline-based treatment by direct-acting agents: The real-life case of hepatitis C management in  
443 Brazil. *BMC Gastroenterol*. 2017;17: 1–11. doi:10.1186/s12876-017-0676-8
- 444 18. Chou R, Hartung D, Rahman B, Wasson N, Cottrell EB, Fu R. Comparative effectiveness of antiviral  
445 treatment for hepatitis C virus infection in adults: A systematic review. *Ann Intern Med*. 2013;158: 114–  
446 123. doi:10.7326/0003-4819-158-2-201301150-00576
- 447 19. Departamento de Informática do SUS/DATASUS-Ministério da Saúde. VinculaSUS. 2020 [citado 8 de  
448 junho de 2020]. Recuperado: [http://datasus1.saude.gov.br/noticias/atualizacoes/1167-datasus-demas-e-](http://datasus1.saude.gov.br/noticias/atualizacoes/1167-datasus-demas-e-hospital-albert-einstein-promovem-workshop-vinculasus)  
449 [hospital-albert-einstein-promovem-workshop-vinculasus](http://datasus1.saude.gov.br/noticias/atualizacoes/1167-datasus-demas-e-hospital-albert-einstein-promovem-workshop-vinculasus)
- 450 20. R Foundation for Statistical. A language and environment for statistical computing. Viena/Austria; 2015.  
451 Recuperado: <https://www.r-project.org/>
- 452 21. Im GY, Dieterich DT. Direct-acting antiviral agents in patients with hepatitis C cirrhosis. *Gastroenterol*  
453 *Hepatol*. 2012;8.
- 454 22. Daniel KE, Saeian K, Rizvi S. Real-world experiences with direct-acting antiviral agents for chronic  
455 hepatitis C treatment. *J Viral Hepat*. 2020;27: 195–204. doi:10.1111/jvh.13218
- 456 23. Reid M, Price JC, Tien PC. Hepatitis C Virus Infection in the Older Patient. *Infect Dis Clin North Am*.

- 457 2017;31: 827–838. doi:10.1016/j.idc.2017.07.014
- 458 24. Ioannou GN, Beste LA, Chang MF, Green PK, Lowy E, Tsui JI, et al. Effectiveness of Sofosbuvir,  
459 Ledipasvir/Sofosbuvir, or Paritaprevir/Ritonavir/Ombitasvir and Dasabuvir Regimens for Treatment of  
460 Patients With Hepatitis C in the Veterans Affairs National Health Care System. *Gastroenterology*.  
461 2016;151: 457-471.e5. doi:10.1053/j.gastro.2016.05.049
- 462 25. Su F, Beste LA, Green PK, Berry K, Ioannou GN. Direct-acting antivirals are effective for chronic  
463 hepatitis C treatment in elderly patients: A real-world study of 17 487 patients. *Eur J Gastroenterol*  
464 *Hepatol*. 2017;29: 686–693. doi:10.1097/MEG.0000000000000858
- 465 26. Ferreira VL, Borba HHL, Wiens A, Pedroso MLA, Radunz VF de C, Ivantes CAP, et al. Effectiveness  
466 and tolerability of direct-acting antivirals for chronic hepatitis C patients in a Southern state of Brazil.  
467 *Brazilian J Infect Dis*. 2018;22: 186–192. doi:10.1016/j.bjid.2018.04.003
- 468 27. Holzmann I, Tovo C V., Minmé R, Leal MP, Kliemann MP, Ubirajara C, et al. Effectiveness of chronic  
469 hepatitis C treatment with direct-acting antivirals in the Public Health System in Brazil. *Brazilian J*  
470 *Infect Dis*. 2018;22: 317–322. doi:10.1016/j.bjid.2018.06.004
- 471 28. Fernandes FF, Piedade J, Guimaraes L, Nunes EP, Chaves U, Goldenzon R V., et al. Effectiveness of  
472 direct-acting agents for hepatitis C and liver stiffness changing after sustained virological response. *J*  
473 *Gastroenterol Hepatol*. 2019;34: 2187–2195. doi:10.1111/jgh.14707
- 474 29. Lobato CM de O, Codes L, Silva GF, Souza AFM, Coelho HSM, Pedroso MLA, et al. Direct antiviral  
475 therapy for treatment of hepatitis C: A real-world study from Brazil. *Ann Hepatol*. 2019;18: 849–854.  
476 doi:10.1016/j.aohep.2019.08.001
- 477 30. Brasil. Ministério da Saúde. Departamento de Condições Crônicas e Infecções Sexualmente  
478 Transmissíveis. In: Tratamento para as hepatites virais [Internet]. 2020 [citado 29 de maio de 2020].  
479 Recuperado: [http://www.aids.gov.br/pt-br/publico-geral/hv/o-que-sao-hepatites/tratamento-para-](http://www.aids.gov.br/pt-br/publico-geral/hv/o-que-sao-hepatites/tratamento-para-hepatites-virais)  
480 [hepatites-virais](http://www.aids.gov.br/pt-br/publico-geral/hv/o-que-sao-hepatites/tratamento-para-hepatites-virais)
- 481 31. Wang GP, Terrault N, Reeves JD, Liu L, Li E, Zhao L, et al. Prevalence and impact of baseline  
482 resistance-associated substitutions on the efficacy of ledipasvir/sofosbuvir or simeprevir/sofosbuvir  
483 against GT1 HCV infection. *Sci Rep*. 2018;8: 1–14. doi:10.1038/s41598-018-21303-2
- 484 32. Das C Hansen KC and Tyler JK LMS. 乳鼠心肌提取 HHS Public Access. *Physiol Behav*. 2017;176:

- 485 139–148. doi:10.1016/j.physbeh.2017.03.040
- 486 33. Torres HA, Economides MP, Angelidakis G, Hosry J, Kyvernitakis A, Mahale P, et al. Sofosbuvir-  
487 Based Therapy in Hepatitis C Virus-Infected Cancer Patients: A Prospective Observational Study. *Am J*  
488 *Gastroenterol.* 2019;114: 250–257. doi:10.1038/s41395-018-0383-2
- 489 34. El-Sayed MH, Ebeid FSES, Zekri AR, Massetto B, Kersey K, Osinusi A, et al. Ledipasvir/Sofosbuvir  
490 for 12 weeks is safe and effective in adolescents with chronic hepatitis C virus infection and  
491 hematological malignancies undergoing chemotherapy. *J Hepatol.* 2018;68: S515. doi:10.1016/s0168-  
492 8278(18)31278-9
- 493 35. Cooke GS, Andrieux-Meyer I, Applegate TL, Atun R, Burry JR, Cheinquer H, et al. Accelerating the  
494 elimination of viral hepatitis: a Lancet Gastroenterology & Hepatology Commission. *Lancet*  
495 *Gastroenterol Hepatol.* 2019;4: 135–184. doi:10.1016/S2468-1253(18)30270-X
- 496
